# Supplementary material for: Periodic density functional theory analysis of direct methane conversion into ethylene and aromatic hydrocarbons catalyzed by Mo4C2/ZSM-5
Source: Royal Society of Chemistry journal article supplement (doi:10.1039/c7cp03440g), 2017-01-01
Supplement: c7cp03440g1.pdf [file c7cp03440g1.pdf]

## Supporting information

### **A Periodic Density Functional Theory Analysis of Direct Methane Conversion into Ethylene and Aromatic Hydrocarbons Catalyzed by $\text{Mo}_4\text{C}_2/\text{ZSM-5}$**

Feng Yin <sup>1</sup>, Meng-Ru Li <sup>2</sup> and Gui-Chang Wang <sup>\*,1,2</sup>

(<sup>1</sup>College of Chemistry, Key Laboratory of Advanced Energy Materials Chemistry (Ministry of Education) and Collaborative Innovation Center of Chemical Science and Engineering(Tianjin),Nankai University, Tianjin 300071, P. R. China; <sup>2</sup> State Key Laboratory of Coal Conversion, Institute of Coal Chemistry, Chinese Academy of Sciences, Taiyuan, 030001, P. R. China)

\*Corresponding author: Gui-Chang Wang. E-mail: wangguichang@nankai.edu.cn

Telephone: +86-22-23503824 (O) Fax: +86-22-23502458

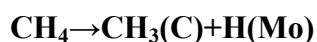

The methane adsorption position is also on the Mo atom site with the adsorption energy is -0.42 eV. The methane dissociated on the Mo atom site as CH<sub>3</sub> and H species, and which the CH<sub>3</sub> species bond with C atom and H species bond with Mo atom. The activation energy is 1.35 eV and the dissociated energy is 0.64 eV. The C-H bond length of TS is 2.25 Å. The distance between CH<sub>3</sub> species and Mo atom is 2.22 Å and between H species and Mo atom is 1.75 Å.

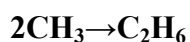

Moreover, we also studied the case of CH<sub>3</sub>(C)+CH<sub>3</sub>(Mo). There are two configurations of CH<sub>3</sub>(C)+CH<sub>3</sub>(Mo). The first configuration is that there are only two CH<sub>3</sub> species respectively bond on Mo atom and C atom. The second configuration is that there are two CH<sub>3</sub> species and two H atom with the structure of CH<sub>3</sub>(Mo)+CH<sub>3</sub>(Mo)+H(Mo)+H(C). The first configuration converted to C<sub>2</sub>H<sub>6</sub> with the energy barrier of 1.37 eV and reaction energy of -0.08 eV. The transition state of this process is that the CH<sub>3</sub>(C) species migrated from the C atom to the Mo atom site. The distances of this CH<sub>3</sub> species with Mo atom is 2.24 Å and with other CH<sub>3</sub> species is 2.64 Å. The distance between two CH<sub>3</sub> species is 2.10 Å. The adsorption position of the C<sub>2</sub>H<sub>6</sub> is different from the previous calculated C<sub>2</sub>H<sub>6</sub> adsorption position, which the position is on the other Mo atom site. We don't calculate this C<sub>2</sub>H<sub>6</sub> converted to C<sub>2</sub>H<sub>4</sub>+2H for the C<sub>2</sub>H<sub>6</sub> can easy migrate between two Mo atoms. For the second configuration converted to ethane, we also ignored the influence of H-atom. The energy barrier of CH<sub>3</sub>(Mo)+CH<sub>3</sub>(C) converted to C<sub>2</sub>H<sub>6</sub>(Mo) is 1.73 eV and the reaction energy is 0.32 eV. There have some different between the two configurations converted, which is for the different position of the CH<sub>3</sub> species. The adsorption position of the C<sub>2</sub>H<sub>6</sub> produced by the second CH<sub>3</sub>(Mo)+CH<sub>3</sub>(C) configuration is same as the previous C<sub>2</sub>H<sub>6</sub> which produced by the configuration of CH<sub>3</sub>(Mo)+CH<sub>3</sub>(Mo). So the next step of C<sub>2</sub>H<sub>6</sub> converted to C<sub>2</sub>H<sub>4</sub>+2H is same as the previous calculated results.

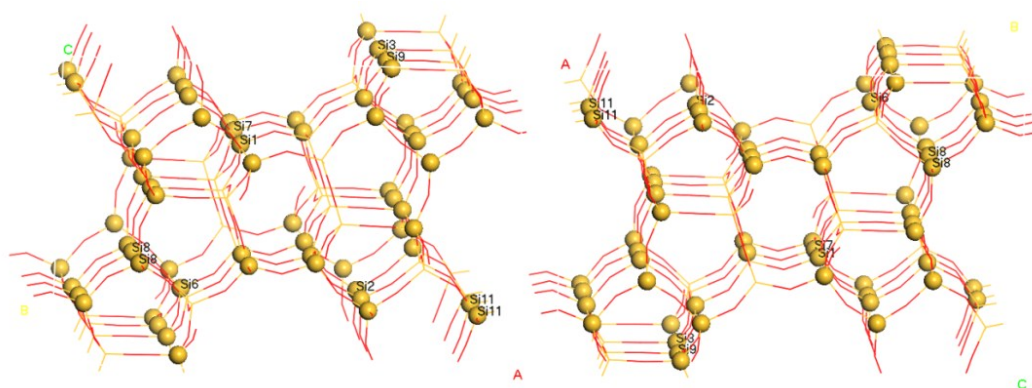

**Figure S1.**The anchoring site of Mo oxide and Mo carbide.

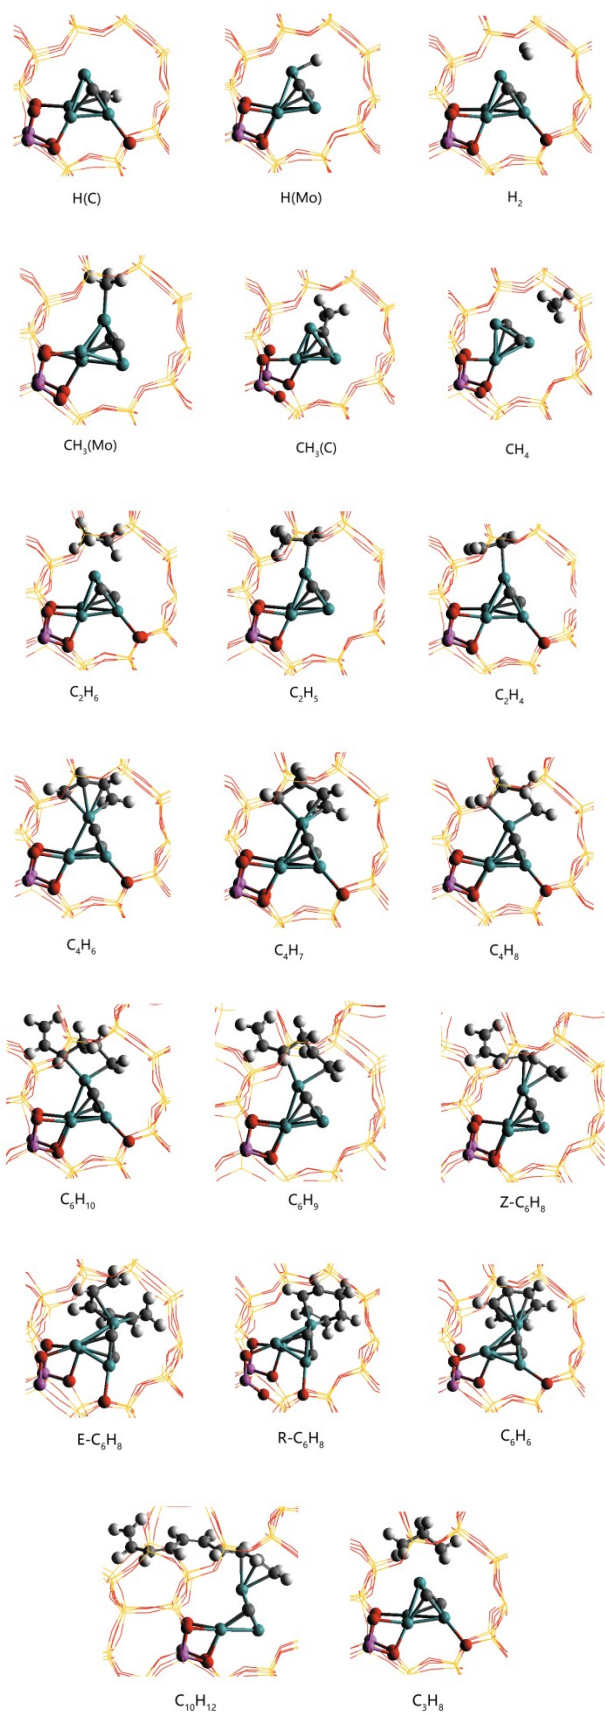

**Figure S2 Most stable adsorption configuration of possible species during the processes of methane cyclization**

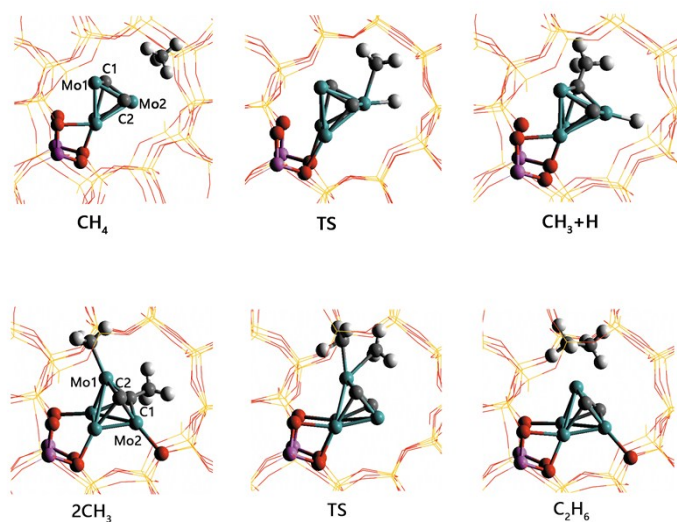

Figure S3. DFT optimized IS, TS and FS for ethane formation

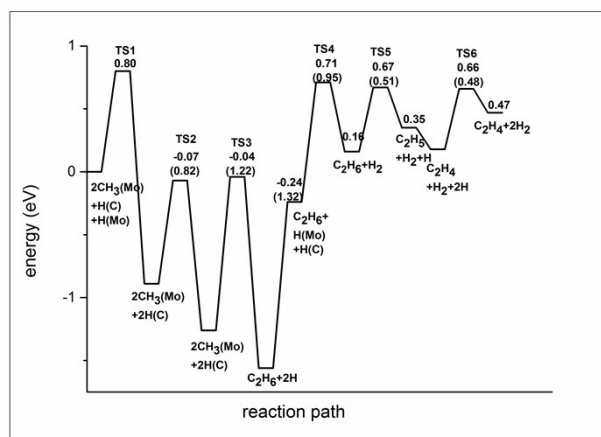

Figure S4. **The Potential Energy Surface** of 2CH<sub>3</sub> to C<sub>2</sub>H<sub>4</sub> in the presence of H species

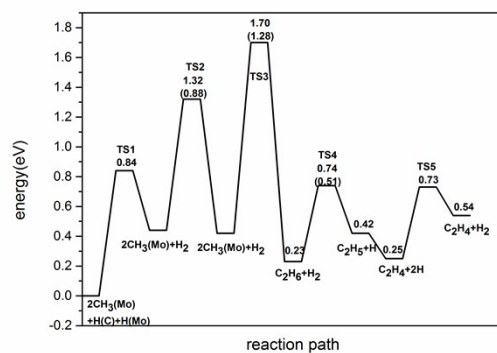

Figure S5: **The Potential Energy Surface** of 2CH<sub>3</sub> to C<sub>2</sub>H<sub>4</sub> without H species

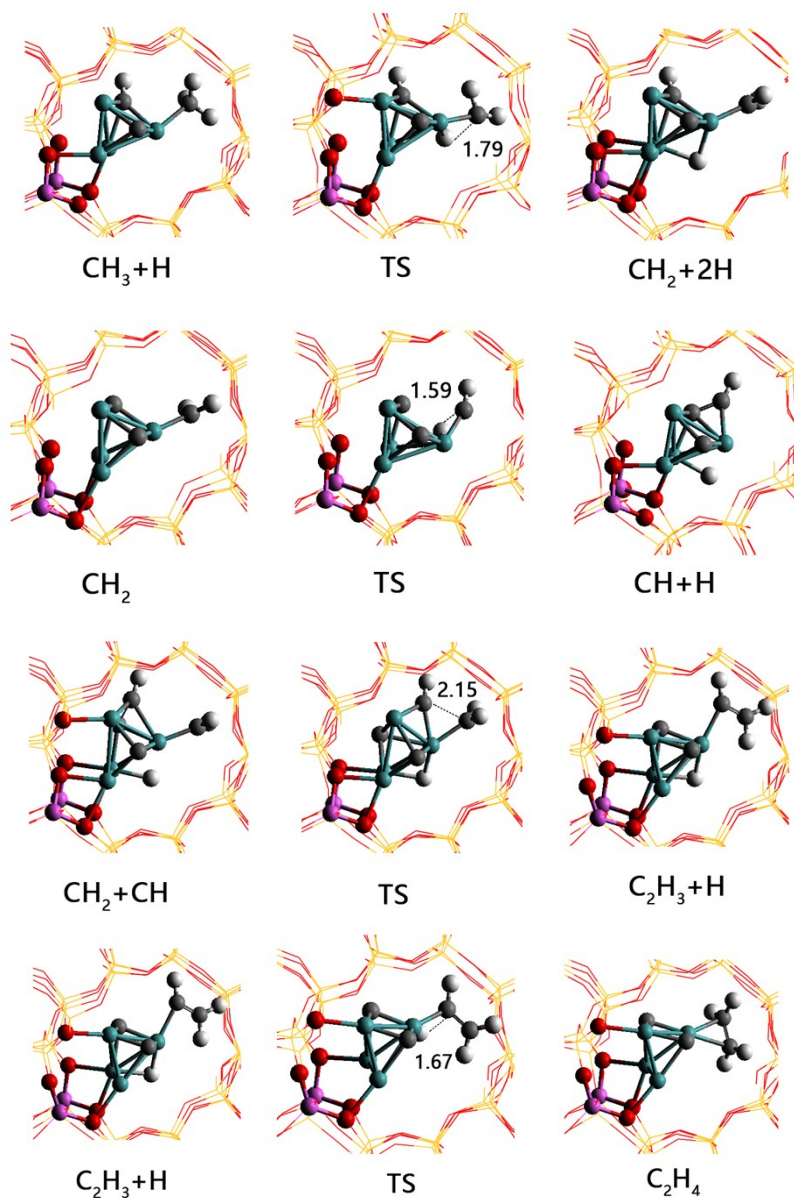

Figure S6. DFT optimized IS, TS and FS for ethylene formation

**Table S1.**Calculated total energy of bond length of Al-Al for the various double Al models

|                       | T1-T3     | T2-T6     | T3-T7     | T1-T9     | T11-T11   | T8-T8     |
|-----------------------|-----------|-----------|-----------|-----------|-----------|-----------|
| E <sub>tot</sub> (au) | -2270.868 | -2270.751 | -2270.806 | -2270.768 | -2270.907 | -2270.933 |
| Al-Al(nm)             | 0.789     | 0.771     | 0.772     | 0.792     | 0.478     | 0.455     |

**Table S2.**Calculated total energy of CH<sub>3</sub> species and H species co-adsorption configurations.

|       | CH <sub>3</sub> (C)+H(C) | CH <sub>3</sub> (Mo)+H(C) | CH <sub>3</sub> (C)+H(Mo) | CH <sub>3</sub> (Mo)+H(Mo) |
|-------|--------------------------|---------------------------|---------------------------|----------------------------|
| E(eV) | -2353.22                 | -2352.36                  | -2351.88                  | -2352.25                   |

**Table S3** Energetic results and bond length at TSs of each elemental step in methane conversion into aromatic hydrocarbons catalyzed by Mo/ZSM-5

| Elemental step                                                                                                   | $\Delta E$ (eV) | E <sub>a</sub> (eV) | Bond length(Å) |
|------------------------------------------------------------------------------------------------------------------|-----------------|---------------------|----------------|
| CH <sub>4</sub> →CH <sub>3</sub> (C1)+H(Mo2)                                                                     | 0.36            | 1.35                | 2.25           |
| CH <sub>3</sub> (Mo1)+CH <sub>3</sub> (Mo2)+H(C1)+H(Mo1)→CH <sub>3</sub> (Mo1)+CH <sub>3</sub> (Mo2)+H(C1)+H(C2) | -0.89           | 0.80                | --             |
| CH <sub>3</sub> (Mo1)+CH <sub>3</sub> (Mo2)+H(C1)+H(C2)→2CH <sub>3</sub> (Mo1)+H(C1)+H(C2)                       | -0.37           | 0.82                | ---            |
| 2CH <sub>3</sub> (Mo1)+H(C1)+H(C2)→C <sub>2</sub> H <sub>6</sub> +H(C1)+H(C2)                                    | -0.30           | 1.22                | 2.02           |
| C <sub>2</sub> H <sub>6</sub> +H(C1)+H(C2)→C <sub>2</sub> H <sub>6</sub> +H(Mo2)+H(C1)                           | 1.32            | 0.00                | --             |
| C <sub>2</sub> H <sub>6</sub> +H(Mo2)+H(C1)→C <sub>2</sub> H <sub>6</sub> +H <sub>2</sub>                        | 0.40            | 0.95                | 1.17           |

**Table S4.** The activation energy and pre-exponential factor for the Micro-kinetic simulation

| Elementary reaction                                                                                   | E <sub>a</sub> | E <sub>a_r</sub> | A        | A <sub>r</sub> |
|-------------------------------------------------------------------------------------------------------|----------------|------------------|----------|----------------|
| CH <sub>4</sub> (g)+* → CH <sub>4</sub> *                                                             | 0.00           | 10.38            | 1.72E+03 | 8.29E+17       |
| CH <sub>4</sub> *+*→CH <sub>3</sub> *+H*                                                              | 23.29          | 20.98            | 9.01E+12 | 8.82E+12       |
| CH <sub>4</sub> (g)+CH <sub>3</sub> *+H**→CH <sub>4</sub> *+CH <sub>3</sub> *+H*                      | 0.00           | 12.22            | 1.72E+03 | 8.29E+17       |
| CH <sub>4</sub> *+CH <sub>3</sub> *+H**→2CH <sub>3</sub> *+2H*                                        | 23.52          | 11.07            | 9.12E+12 | 8.99E+12       |
| 2CH <sub>3</sub> *+2H*→2CH <sub>3</sub> *+H <sub>2</sub> **                                           | 17.76          | 7.84             | 8.75E+12 | 7.96E+12       |
| 2CH <sub>3</sub> *+H <sub>2</sub> *→2CH <sub>3</sub> *+H <sub>2</sub> (g)+*                           | 11.99          | 0.00             | 2.16E+15 | 4.87E+3        |
| 2CH <sub>3</sub> *→C <sub>2</sub> H <sub>6</sub> **                                                   | 31.13          | 32.05            | 8.44E+12 | 9.04E+12       |
| C <sub>2</sub> H <sub>6</sub> *→C <sub>2</sub> H <sub>6</sub> (g)+*                                   | 20.06          | 0.00             | 4.97E+17 | 1.26E+03       |
| C <sub>2</sub> H <sub>6</sub> *+2*→C <sub>2</sub> H <sub>4</sub> *+2H*                                | 8.76           | 6.69             | 9.14E+12 | 8.73E+12       |
| C <sub>2</sub> H <sub>4</sub> *+2H*→C <sub>2</sub> H <sub>4</sub> *+H <sub>2</sub> **                 | 9.92           | 2.54             | 8.83E+12 | 7.37E12        |
| C <sub>2</sub> H <sub>4</sub> *+H <sub>2</sub> *→C <sub>2</sub> H <sub>4</sub> *+H <sub>2</sub> (g)+* | 11.99          | 0.00             | 4.32E+15 | 4.87E+03       |
| C <sub>2</sub> H <sub>4</sub> *→C <sub>2</sub> H <sub>4</sub> (g)+*                                   | 32.05          | 10.38            | 7.54E+17 | 1.30E+03       |

Note: E<sub>a\_r</sub> means the energy barrier of reverse reaction, and A<sub>r</sub> means pre-exponential factor for reverse reaction. E<sub>a</sub> in kcal/mol, and A in s<sup>-1</sup>·Pa<sup>-1</sup> for adsorption process and s<sup>-1</sup> for reaction and desorption process.
